# Supplementary material for: Deciphering Distinct Genetic Risk Factors for FTLD-TDP Pathological Subtypes via Whole-Genome Sequencing
Source: bioRxiv or medRxiv preprint supplement (doi:10.1101/2024.06.24.24309088), 2024-06-25

# Deciphering Distinct Genetic Risk Factors for FTL-D-TDP Pathological Subtypes via Whole-Genome Sequencing

Cyril Pottier<sup>1,2,3,4,5,\*</sup>, Fahri Küçükali<sup>2,3</sup>, Matt Baker<sup>1</sup>, Anthony Batzler<sup>6</sup>, Gregory D. Jenkins<sup>6</sup>, Marka van Blitterswijk<sup>1</sup>, Cristina T. Vicente<sup>2,3</sup>, Wouter De Coster<sup>2,3</sup>, Sarah Wynants<sup>2,3</sup>, Pieter Van de Walle<sup>2,3</sup>, Owen A. Ross<sup>1</sup>, Melissa E. Murray<sup>1</sup>, Júlia Faura<sup>2,3</sup>, Stephen J. Haggarty<sup>7</sup>, Jeroen GJ. van Rooij<sup>8</sup>, Merel O. Mol<sup>8</sup>, Ging-Yuek R. Hsiung<sup>9</sup>, Caroline Graff<sup>10,11</sup>, Linn Öijerstedt<sup>10,11</sup>, Manuela Neumann<sup>12,13</sup>, Yan Asmann<sup>14</sup>, Shannon K. McDonnell<sup>6</sup>, Saurabh Baheti<sup>6</sup>, Keith A. Josephs<sup>15</sup>, Jennifer L. Whitwell<sup>16</sup>, Kevin F. Bieniek<sup>1,17</sup>, Leah Forsberg<sup>15</sup>, Hilary Heuer<sup>18</sup>, Argentina Lario Lago<sup>18</sup>, Ethan G. Geier<sup>18</sup>, Jennifer S. Yokoyama<sup>18</sup>, Alexis P. Oddi<sup>18</sup>, Margaret Flanagan<sup>17</sup>, Qinwen Mao<sup>19</sup>, John R. Hodges<sup>20</sup>, John B. Kwok<sup>21,22</sup>, Kimiko Domoto-Reilly<sup>23</sup>, Matthis Synofzik<sup>12,24</sup>, Carlo Wilke<sup>12,24</sup>, Chiadi Onyike<sup>25</sup>, Bradford C. Dickerson<sup>26</sup>, Bret M. Evers<sup>27</sup>, Brittany N. Dugger<sup>28</sup>, David G. Munoz<sup>29,30</sup>, Julia Keith<sup>30,31</sup>, Lorne Zinman<sup>31</sup>, Ekaterina Rogueva<sup>32</sup>, EunRan Suh<sup>33</sup>, Tamar Gefen<sup>34</sup>, Changiz Geula<sup>34</sup>, Sandra Weintraub<sup>34</sup>, Janine Diehl-Schmid<sup>35,36</sup>, Martin R. Farlow<sup>37</sup>, Dieter Edbauer<sup>38</sup>, Bryan K. Woodruff<sup>39</sup>, Richard J. Caselli<sup>39</sup>, Laura L. Donker Kaat<sup>40</sup>, Edward D. Huey<sup>41</sup>, Eric M. Reiman<sup>42</sup>, Simon Mead<sup>43</sup>, Andrew King<sup>44,45</sup>, Sigrun Roeber<sup>46</sup>, Alissa L. Nana<sup>18</sup>, Nilufer Ertekin-Taner<sup>1,47</sup>, David S. Knopman<sup>15</sup>, Ronald C. Petersen<sup>15</sup>, Leonard Petrucelli<sup>1</sup>, Ryan J. Uitti<sup>47</sup>, Zbigniew K. Wszolek<sup>47</sup>, Eliana Marisa Ramos<sup>48</sup>, Lea T. Grinberg<sup>18</sup>, Maria Luisa Gorno Tempini<sup>18</sup>, Howard J. Rosen<sup>49</sup>, Salvatore Spina<sup>18</sup>, Olivier Piguet<sup>50</sup>, Murray Grossman<sup>51</sup>, John Q. Trojanowski<sup>33</sup>, Dirk C. Keene<sup>52</sup>, Jin Lee-Way<sup>53</sup>, Johannes Prudlo<sup>54,55</sup>, Daniel H. Geschwind<sup>48</sup>, Robert A. Rissman<sup>56</sup>, Carlos Cruchaga<sup>57</sup>, Bernardino Ghetti<sup>58</sup>, Glenda M. Halliday<sup>21</sup>, Thomas G. Beach<sup>59</sup>, Geidy E. Serrano<sup>59</sup>, Thomas Arzberger<sup>46,60</sup>, Jochen Herms<sup>38,46</sup>, Adam L. Boxer<sup>18</sup>, Lawrence S. Honig<sup>61</sup>, Jean P. Vonsattel<sup>62</sup>, Oscar L. Lopez<sup>63</sup>, Julia Kofler<sup>64</sup>, Charles L. White III<sup>27</sup>, Marla Gearing<sup>65</sup>, Jonathan Glass<sup>65</sup>, Jonathan D. Rohrer<sup>66</sup>, David J. Irwin<sup>51</sup>, Edward B. Lee<sup>33</sup>, Viviana Van Deerlin<sup>33</sup>, Rudolph Castellani<sup>67</sup>, Marsel M. Mesulam<sup>34</sup>, Maria C. Tartaglia<sup>32</sup>, Elizabeth C. Finger<sup>68</sup>, Claire Troakes<sup>44</sup>, Safa Al-Sarraj<sup>44,69</sup>, Bruce L. Miller<sup>18</sup>, Harro Seelaar<sup>8</sup>, Neill R. Graff-Radford<sup>47</sup>, Bradley F. Boeve<sup>15</sup>, Ian RA. Mackenzie<sup>70</sup>, John C. van Swieten<sup>8</sup>, William W. Seeley<sup>18</sup>, Kristel Slegers<sup>2,2</sup>, Dennis W. Dickson<sup>1</sup>, Joanna M. Biernacka<sup>6,71</sup>, Rosa Rademakers<sup>1,2,3,\*</sup>

† In memoriam

## \* Corresponding Authors

Rosa Rademakers, Ph.D. (ORCID: 0000-0002-4049-0863)

VIB Center for Molecular Neurology

Universiteitsplein 1, 2610 Wilrijk, Belgium

Phone: +32 3 265 95 95

E-mail: [rosa.rademakers@uantwerpen.vib.be](mailto:rosa.rademakers@uantwerpen.vib.be)

Cyril Pottier, Ph.D.

Department of Neurology, Washington University School of Medicine

St Louis, MO, United States of America

Phone: +1 314 747 2601

E-mail: [cpottier@wustl.edu](mailto:cpottier@wustl.edu)

<sup>1</sup>Department of Neuroscience, Mayo Clinic, 4500 San Pablo Road, Jacksonville, FL, 32224, United States of America

<sup>2</sup>Department of Biomedical Sciences, University of Antwerp, Antwerp, Belgium

<sup>3</sup>VIB Center for Molecular Neurology, VIB, Antwerp, Belgium

<sup>4</sup>Department of Neurology, Washington University School of Medicine, St Louis, MO, United States of America

<sup>5</sup>NeuroGenomics and Informatics Center, Washington University School of Medicine, St Louis, MO, United States of America

<sup>6</sup>Department of Quantitative Health Sciences, Mayo Clinic, Rochester, MN, 55905, United States of America

<sup>7</sup>Department of Neurology, Massachusetts General Hospital and Harvard Medical School, Boston, MA, 02114, United States of America

<sup>8</sup>Department of Neurology, Erasmus Medical Center, Wytemaweg 80, Rotterdam, 3015 CN, The Netherlands

<sup>9</sup>Department of Medicine, Division of Neurology, University of British Columbia, Vancouver, BC, V6T 2B5, Canada

<sup>10</sup>Division of Neurogeriatrics, Karolinska Institutet, Bioclinicum J10:20, Visionsgatan 4, Solna, 171 64, Sweden

<sup>11</sup>Unit for Hereditary Dementias, Karolinska University Hospital, Solna, 171 64, Sweden

<sup>12</sup>German Center for Neurodegenerative Diseases (DZNE), Tübingen, 72076, Germany

- <sup>13</sup>Department of Neuropathology, University of Tübingen, Tübingen, 72076, Germany
- <sup>14</sup>Department of Health Sciences Research, Mayo Clinic, 4500 San Pablo Road, Jacksonville, FL, 32224, United States of America
- <sup>15</sup>Department of Neurology, Mayo Clinic, Rochester, MN, 55905, United States of America
- <sup>16</sup>Department of Radiology, Mayo Clinic, Rochester, MN, 55905, United States of America
- <sup>17</sup>University of Texas Health Science Center San Antonio, San Antonio, TX, 78229, United States of America
- <sup>18</sup>Department of Neurology, UCSF Weill Institute for Neurosciences, University of California, San Francisco, San Francisco, CA, 94158, United States of America
- <sup>19</sup>Department of Pathology, University of Utah, Salt Lake City, UT, 84112, United States of America
- <sup>20</sup>Central Clinical School and Brain and Mind Centre, University of Sydney, Sydney, 2050, Australia
- <sup>21</sup>University of Sydney, Sydney, 2050, Australia
- <sup>22</sup>NeuRA, University of New South Wales, Randwick, 2031, Australia
- <sup>23</sup>Department of Neurology, University of Washington, 325 9th Ave, Seattle, WA, 98104, United States of America
- <sup>24</sup>Division Translational Genomics of Neurodegenerative Diseases, Center for Neurology and Hertie-Institute for Clinical Brain Research, University of Tübingen, Tübingen, Germany
- <sup>25</sup>Department of Psychiatry and Behavioral Sciences, Johns Hopkins University, Baltimore, MD, 21218, United States of America
- <sup>26</sup>Department of Neurology, Case Western Reserve University, Cleveland, OH, 44106, United States of America
- <sup>27</sup>Division of Neuropathology, University of Texas Southwestern Medical Center, 5323 Harry Hines Blvd, Dallas, TX, 75390-9073, United States of America
- <sup>28</sup>Department of Pathology and Laboratory Medicine, University of California, Davis Medical Center, Sacramento, CA, 95817, United States of America
- <sup>29</sup>St. Michael's Hospital, 30 Bond St, Toronto, ON, M5B 1W8, Canada
- <sup>30</sup>Department of Laboratory Medicine and Pathobiology, University of Toronto, Toronto, ON, M5S 1A1, Canada
- <sup>31</sup>Sunnybrook Health Sciences Centre, Toronto, ON, M4N 3M5, Canada
- <sup>32</sup>Krembil Discovery Tower, Tanz Centre for Research in Neurodegenerative Disease, University of Toronto, 60 Leonard Av, Toronto, ON, M5T 0S8, Canada
- <sup>33</sup>Department of Pathology and Laboratory Medicine, Center for Neurodegenerative Disease Research,

Perelman School of Medicine at the University of Pennsylvania, Philadelphia, PA, 19104, United States of America

<sup>34</sup>Mesulam Center for Cognitive Neurology and Alzheimer's Disease, Northwestern University, Chicago, IL, 60611, United States of America

<sup>35</sup>Department of Psychiatry and Psychotherapy, Technical University of Munich, Munich, 80333, Germany

<sup>36</sup>kbo-Inn-Salzach-Klinikum, Clinical Center for Psychiatry, Psychotherapy, Psychosomatic Medicine, Geriatrics and Neurology, Wasserburg/Inn, 83512, Germany

<sup>37</sup>Department of Neurology, Indiana University School of Medicine, 355 West 16th Street, Indianapolis, IN, 46202, United States of America

<sup>38</sup>German Center for Neurodegenerative Diseases (DZNE), Feodor-Lynen-Str 17, Munich, 81377, Germany

<sup>39</sup>Department of Neurology, Mayo Clinic, Scottsdale, AZ, 85259, United States of America

<sup>40</sup>Department of Clinical Genetics, Erasmus Medical Center, Wytemaweg 80, Rotterdam, 3015 CN, The Netherlands

<sup>41</sup>Department of Psychiatry and Human Behavior, Brown Alpert Medical School, Brown University, Providence, RI, 02912, United States of America

<sup>42</sup>Banner Alzheimer's Institute, Phoenix, AZ, 85006, United States of America

<sup>43</sup>MRC Prion Unit at University College London, Institute of Prion Diseases, London, United Kingdom

<sup>44</sup>Department of Basic and Clinical Neuroscience, London Neurodegenerative Diseases Brain Bank, Institute of Psychiatry, Psychology and Neuroscience, King's College London, London, SE5 8AF, United Kingdom

<sup>45</sup>Department of Clinical Neuropathology, King's College Hospital NHS Foundation Trust, London, SE5 9RS, United Kingdom

<sup>46</sup>Centre for Neuropathology and Prion Research, Ludwig-Maximilians-University of Munich, Feodor-Lynen-Straße 23, Munich, 81377, Germany

<sup>47</sup>Department of Neurology, Mayo Clinic, 4500 San Pablo Road, Jacksonville, FL, 32224, United States of America

<sup>48</sup>Department of Neurology, David Geffen School of Medicine, University of California, Los Angeles, Los Angeles, CA, 90095, United States of America

<sup>49</sup>Department of Pathology, UCSF Weill Institute for Neurosciences, University of California, San Francisco, San Francisco, CA, 94158, United States of America

- <sup>50</sup>School of Psychology and Brain and Mind Centre, University of Sydney, Sydney, 2050, Australia
- <sup>51</sup>Department of Neurology, Penn Frontotemporal Degeneration Center, Perelman School of Medicine at the University of Pennsylvania, Philadelphia, PA, 19104, United States of America
- <sup>52</sup>University of Washington BioRepository and Integrated Neuropathology (BRaIN) lab, Harborview Medical Center, 325 9th Ave, Seattle, WA, 98104, United States of America
- <sup>53</sup>M.I.N.D. Institute Laboratory, University of California, Davis Medical Center, 2805 50th St, Sacramento, CA, 95817, United States of America
- <sup>54</sup>German Center for Neurodegenerative Diseases (DZNE), Rostock, 18147, Germany
- <sup>55</sup>Department of Neurology, Rostock University Medical Center, Rostock, 18147, Germany
- <sup>56</sup>Alzheimer's Therapeutic Research Institute, Keck School of Medicine of the University of Southern California, San Diego, CA, USA
- <sup>57</sup>Department of Psychiatry, Knight Alzheimer Disease Research Center, Washington University School of Medicine, Saint Louis, MO, 63108, United States of America
- <sup>58</sup>Department of Pathology and Laboratory Medicine, Indiana University School of Medicine, 635 Barnhill Drive, Indianapolis, IN, 46202, United States of America
- <sup>59</sup>Civin Laboratory for Neuropathology, Banner Sun Health Research Institute, Sun City, AZ, 85351, United States of America
- <sup>60</sup>Department of Psychiatry and Psychotherapy, University Hospital, Ludwig-Maximilians-University of Munich, Munich, 81377, Germany
- <sup>61</sup>Department of Neurology, Taub Institute for Research on Alzheimer's Disease and the Aging Brain, Columbia University Irving Medical Center, 630 West 168th St, New York, NY, 10032, United States of America
- <sup>62</sup>Department of Pathology, Taub Institute for Research on Alzheimer's Disease and the Aging Brain, Columbia University Irving Medical Center, 630 West 168th St, New York, NY, 10032, United States of America
- <sup>63</sup>Department of Neurology, University of Pittsburgh, Pittsburgh, PA, 15213, United States of America
- <sup>64</sup>Department of Pathology, University of Pittsburgh, Pittsburgh, PA, 15213, United States of America
- <sup>65</sup>Department of Pathology and Laboratory Medicine and Department of Neurology, Emory University, Atlanta, GA, 30322, United States of America
- <sup>66</sup>Department of Neurodegenerative Disease, Dementia Research Centre, University College London Queen Square Institute of Neurology, London, WC1N 3BG, United Kingdom
- <sup>67</sup>Department of Pathology, Feinberg School of Medicine, Northwestern University, Chicago, IL, 60611,

United States of America

<sup>68</sup>Department of Clinical Neurological Sciences, Schulich School of Medicine and Dentistry, University of Western Ontario, London, ON, N6A 2E2, Canada

<sup>69</sup>King's College Hospital NHS Foundation Trust, London, SE5 9RS, United Kingdom

<sup>70</sup>Department of Pathology and Laboratory Medicine, University of British Columbia, Vancouver, BC, V6T 1Z7, Canada

<sup>71</sup>Department of Psychiatry & Psychology, Mayo Clinic, Rochester, MN, 55905, United States of America

## SUPPLEMENTARY FIGURES

**Supplementary Figure 1. Age at onset and age at death distribution.** Violin plots showing age at onset (A) and age at death (B) are represented as well as box plots for each patient/control groups.

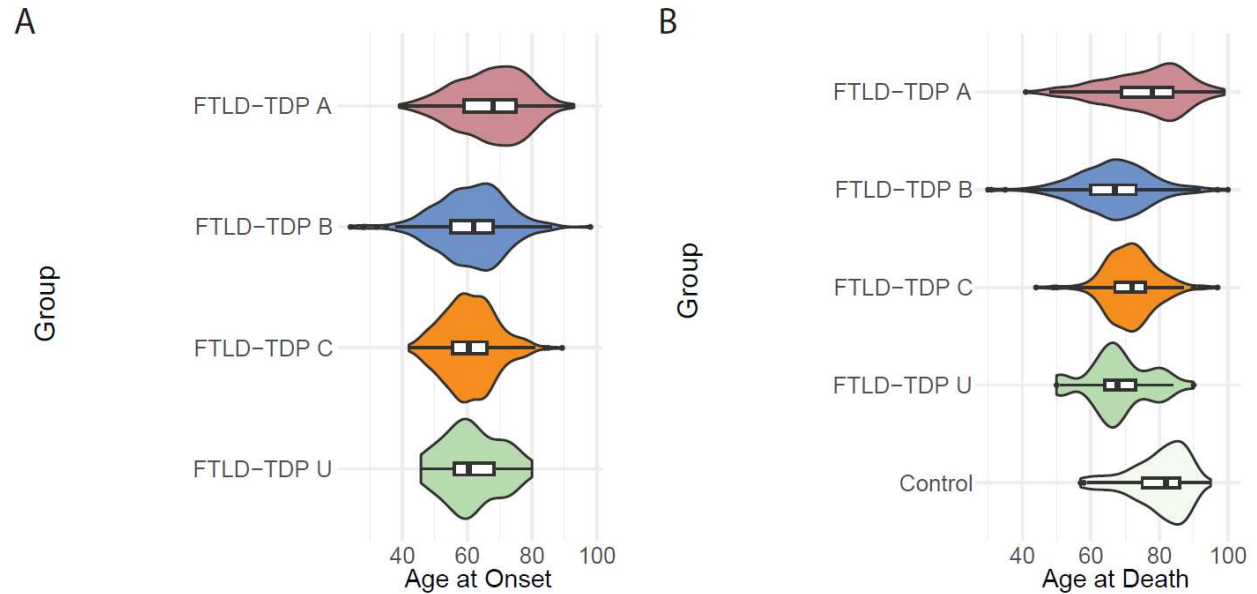

**Supplementary Figure 2. Gene prioritization results for FTLD-TDP All.** A visual summary of weighted evidence category scores for the prioritized genes within genome-wide significant and subthreshold loci for FTLD-TDP All GWAS. The leftmost squares indicate the locus index numbers which contain additional “\_S” patterns for the subthreshold loci, meanwhile others indicate the genome-wide significant loci. The types of evidence for each category are colored according to the six different domains to which they belonged. Weighted scores for each evidence category are rescaled to a 0–100 scale based on the maximum score a candidate gene can obtain from a category (see **Supplementary Table 2**). The darker colors represent higher scores in categories, while tier 1 prioritized genes are displayed in dark green and tier 2 prioritized genes are displayed in light green. Only tier 1 and tier 2 genes are shown for each locus, and all candidate genes considered and scored can be found in **Supplementary Table 3**. MAFs (based on gnomAD v4 non-Finnish European samples) and CADD (v1.7) PHRED scores for rare and/or protein-altering rare variants are labeled in white within the respective squares. eQTL, expression QTL; sQTL, splicing QTL; mQTL, methylation QTL; pQTL, protein-expression QTL; haQTL, histone acetylation QTL; coloc, colocalization; eTWAS, expression transcriptome-wide association study; sTWAS, splicing transcriptome-wide association study; PWAS, proteome-wide association study; Mon. Mac., monocytes and macrophages; LCL, lymphoblastoid cell line; QTLCat, The eQTL Catalogue.

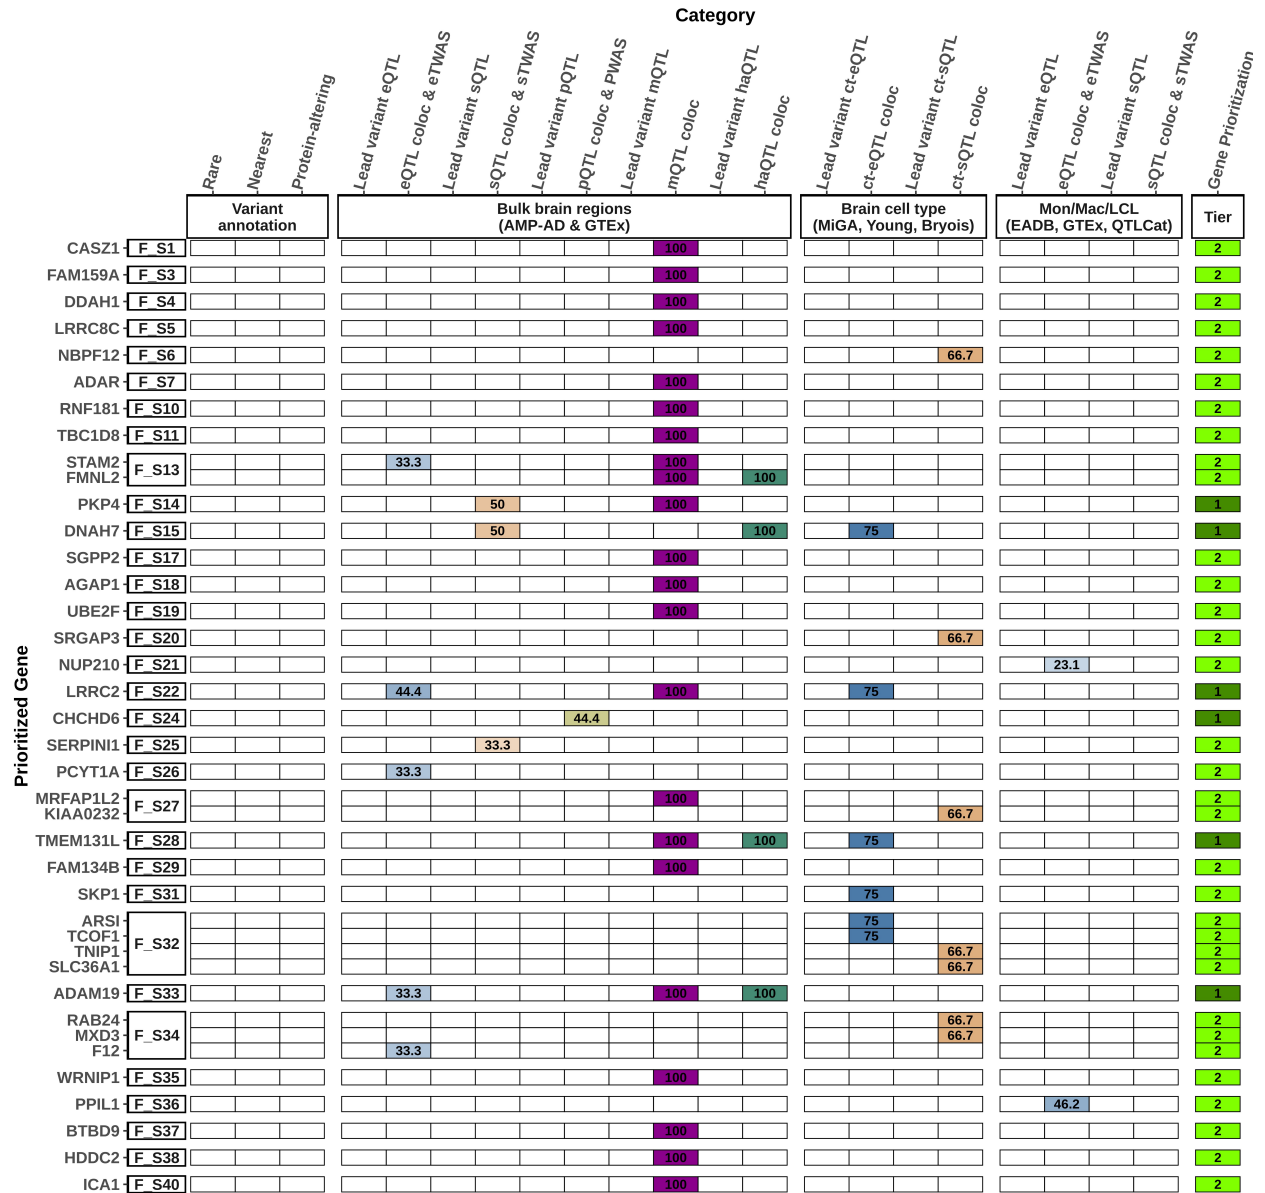

Domain or Type: eQTL-GWAS Integration (blue), sQTL-GWAS Integration (orange), pQTL-GWAS Integration (green), mQTL-GWAS Integration (purple), haQTL-GWAS Integration (teal), Prioritized Gene Tier (dark green)

Per Category Rescaled Score: 0 25 50 75 100



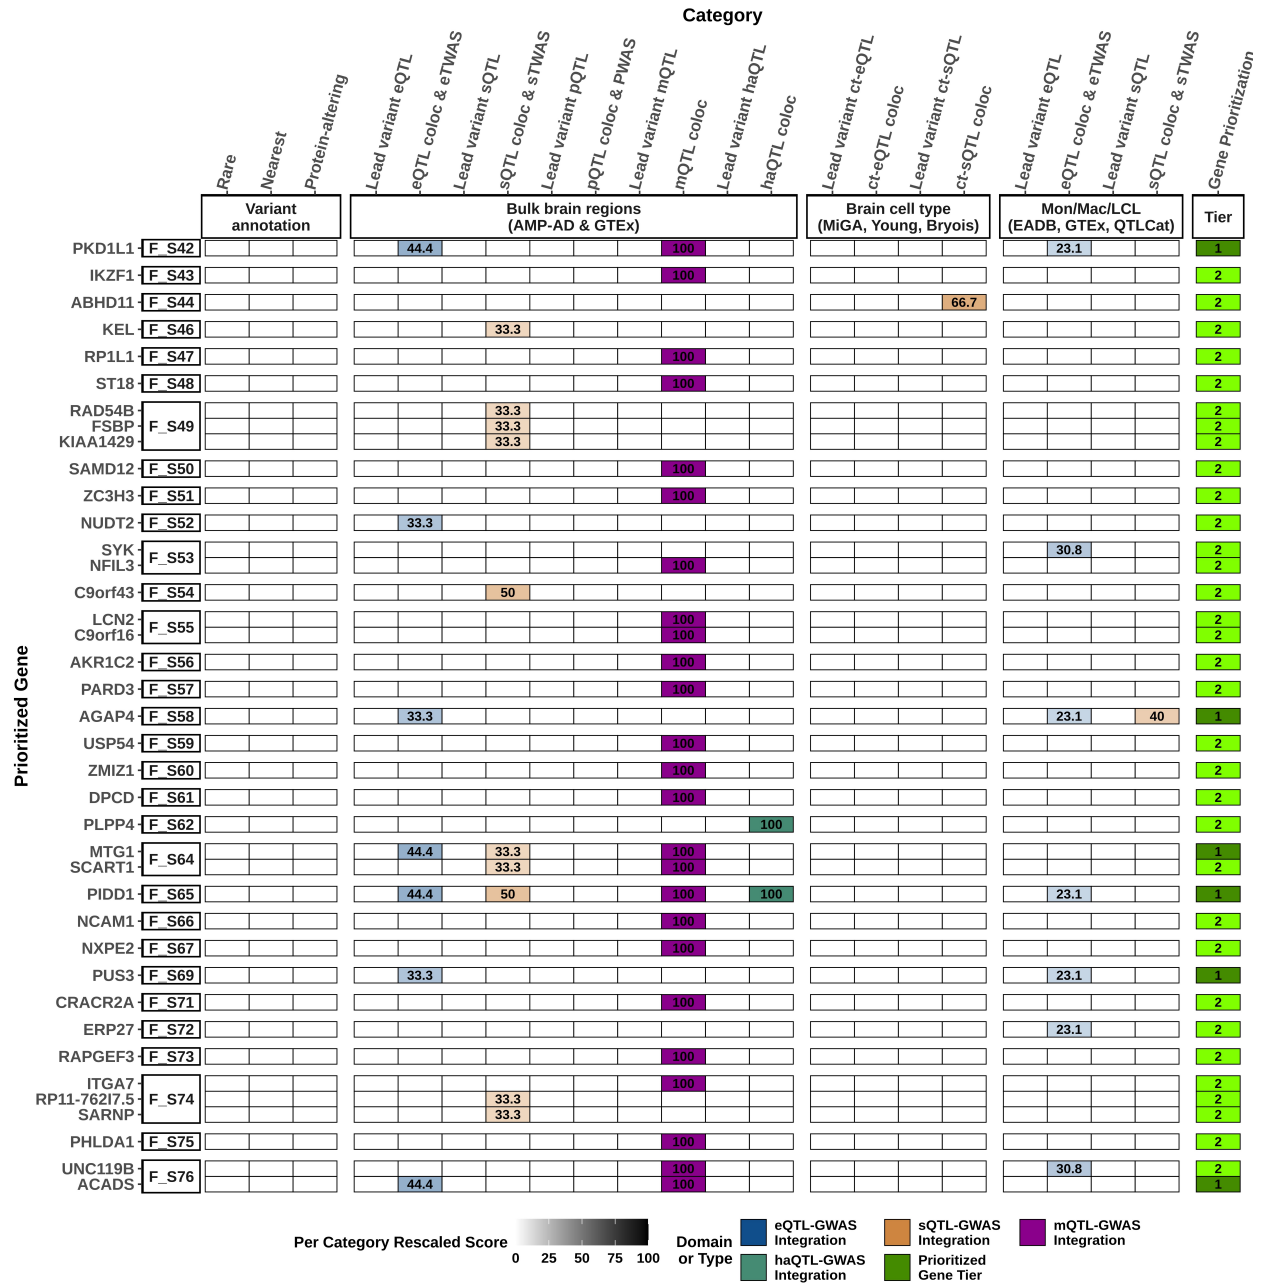

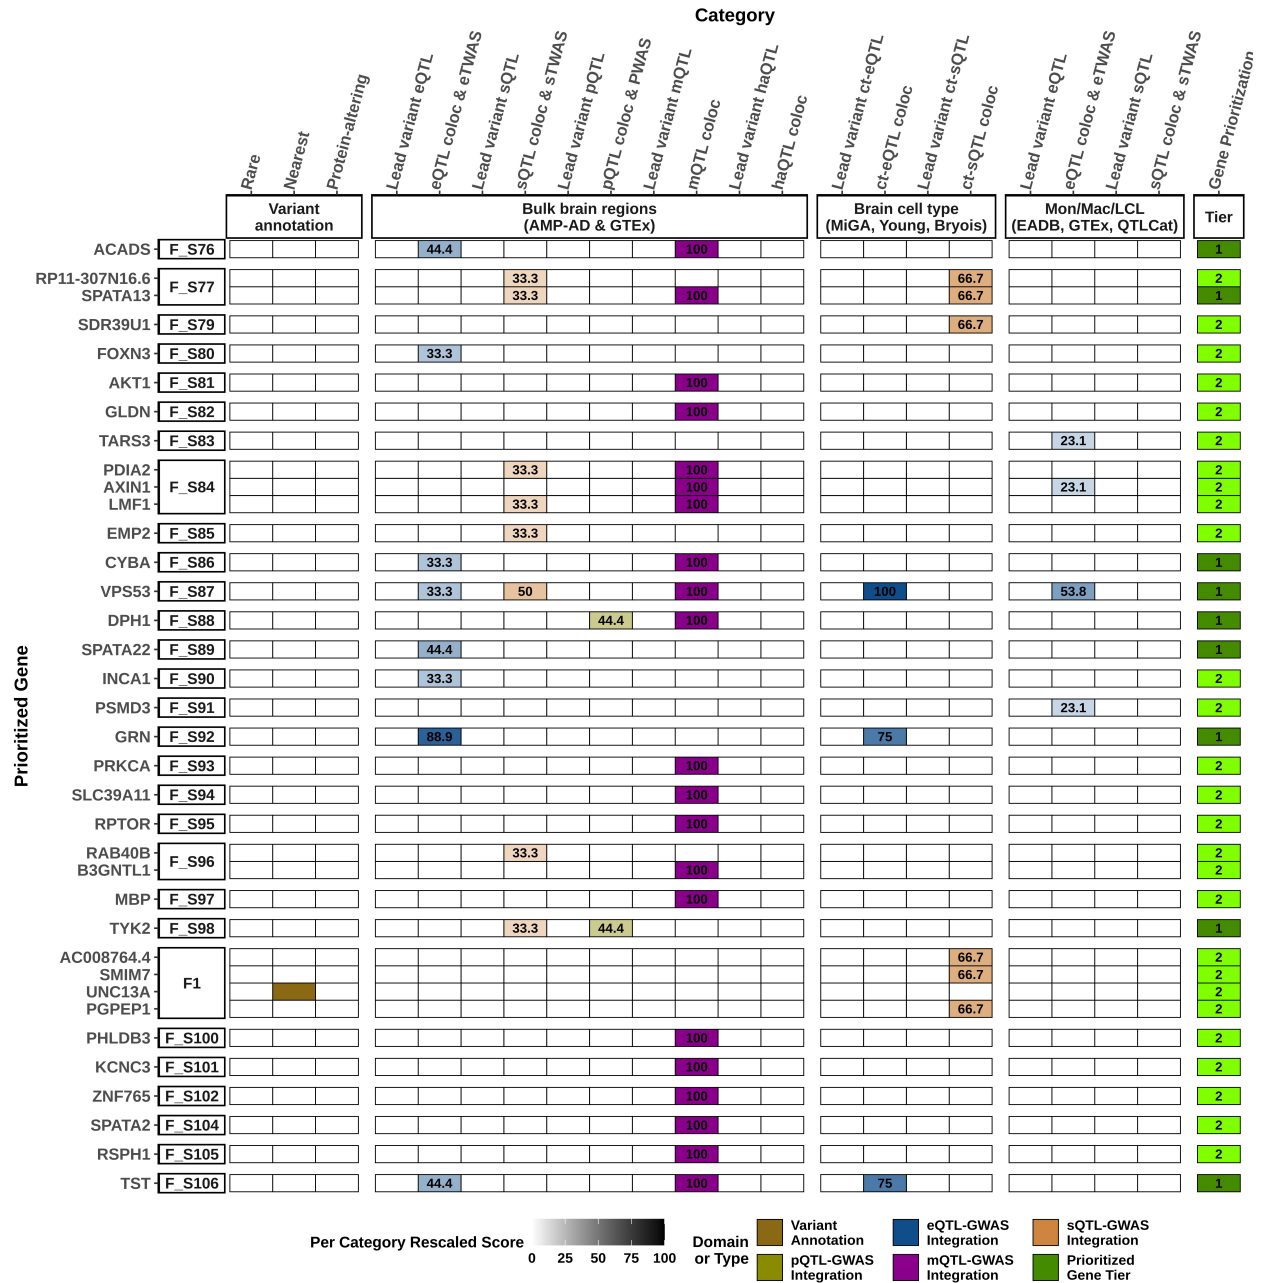

**Supplementary Figure 3. Gene prioritization results for FTL D-TDP A.** A visual summary of weighted evidence category scores for the prioritized genes within genome-wide significant and subthreshold loci for FTL D-TDP A GWAS. The leftmost squares indicate the locus index numbers which contain additional “\_S” patterns for the subthreshold loci, meanwhile others indicate the genome-wide significant loci. The types of evidence for each category are colored according to the six different domains to which they belonged. Weighted scores for each evidence category are rescaled to a 0–100 scale based on the maximum score a candidate gene can obtain from a category (see **Supplementary Table 2**). The darker colors represent higher scores in categories, while tier 1 prioritized genes are displayed in dark green and tier 2 prioritized genes are displayed in light green. Only tier 1 and tier 2 genes are shown for each locus, and all candidate genes considered and scored can be found in **Supplementary Table 3**. MAFs (based on gnomAD v4 non-Finnish European samples) and CADD (v1.7) PHRED scores for rare and/or protein-altering rare variants are labeled in white within the respective squares. eQTL, expression QTL; sQTL, splicing QTL; mQTL, methylation QTL; pQTL, protein-expression QTL; haQTL, histone acetylation QTL; coloc, colocalization; eTWAS, expression transcriptome-wide association study; sTWAS, splicing transcriptome-wide association study; PWAS, proteome-wide association study; Mon. Mac., monocytes and macrophages; LCL, lymphoblastoid cell line; QTLCat, The eQTL Catalogue.

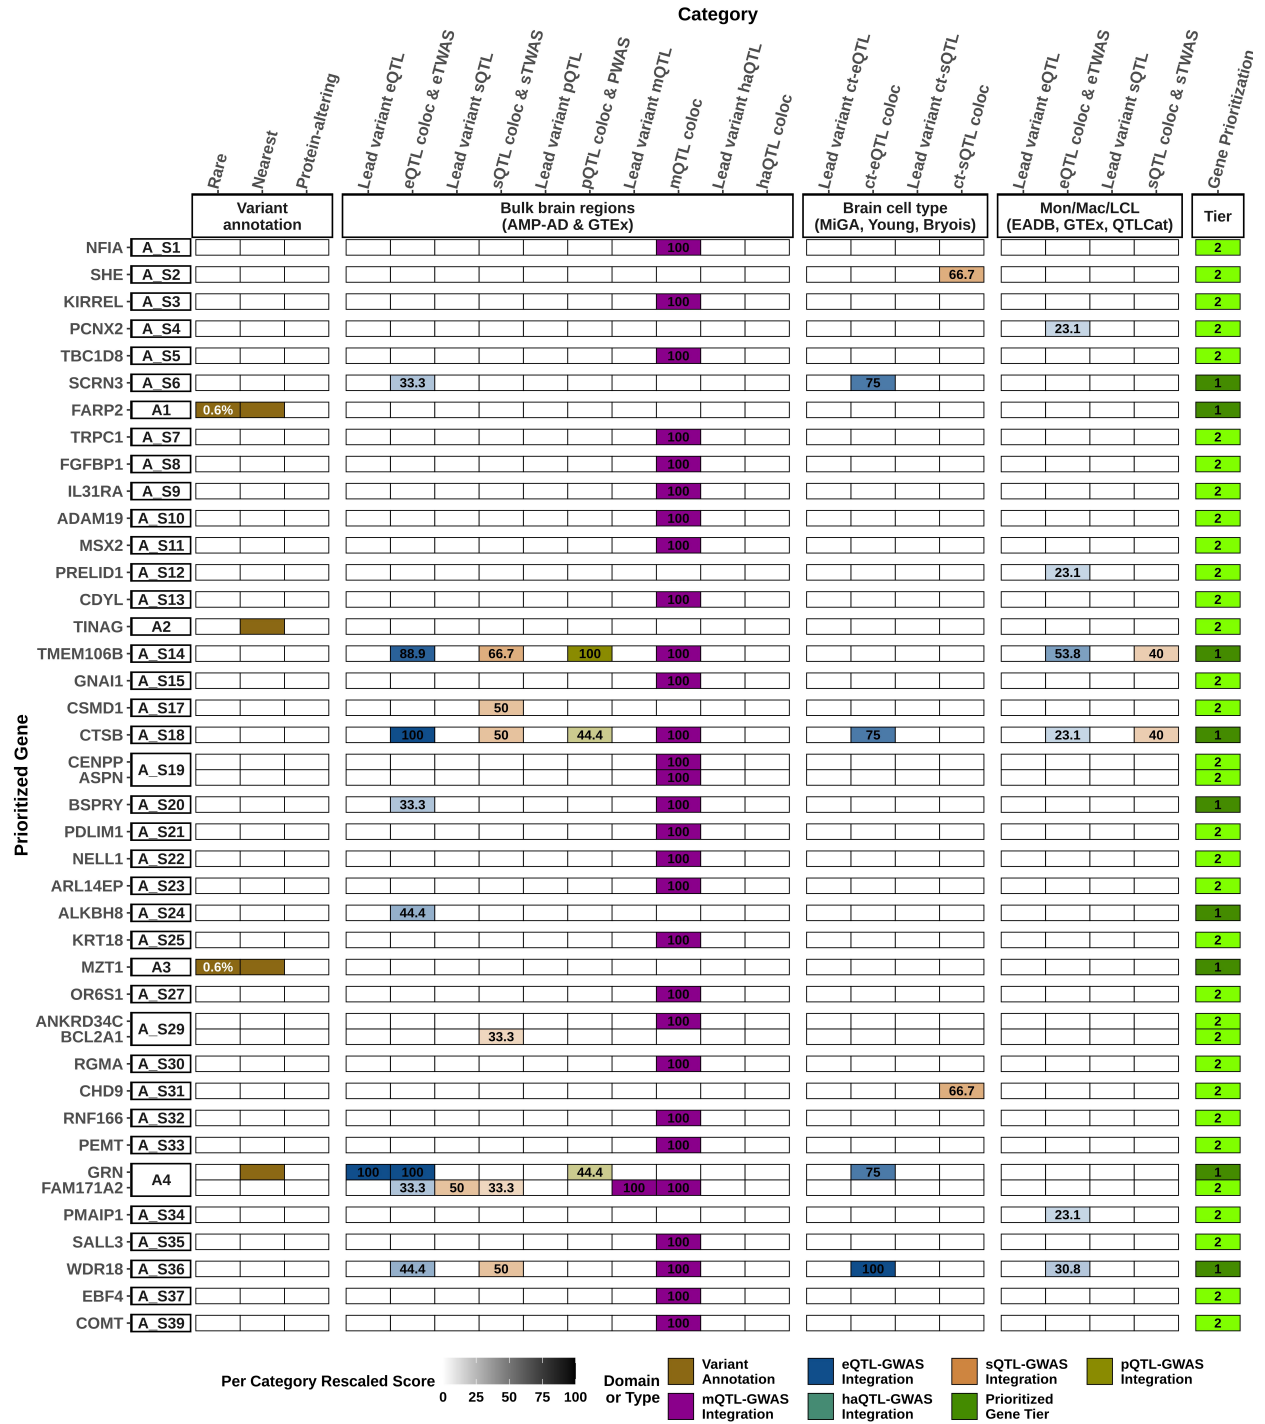

**Supplementary Figure 4. Gene prioritization results for FTL D-TDP B.** A visual summary of weighted evidence category scores for the prioritized genes within genome-wide significant and subthreshold loci for FTL D-TDP B GWAS. The leftmost squares indicate the locus index numbers which contain additional “\_S” patterns for the subthreshold loci, meanwhile others indicate the genome-wide significant loci. The types of evidence for each category are colored according to the six different domains to which they belonged. Weighted scores for each evidence category are rescaled to a 0–100 scale based on the maximum score a candidate gene can obtain from a category (see **Supplementary Table 2**). The darker colors represent higher scores in categories, while tier 1 prioritized genes are displayed in dark green and tier 2 prioritized genes are displayed in light green. Only tier 1 and tier 2 genes are shown for each locus, and all candidate genes considered and scored can be found in **Supplementary Table 3**. MAFs (based on gnomAD v4 non-Finnish European samples) and CADD (v1.7) PHRED scores for rare and/or protein-altering rare variants are labeled in white within the respective squares. eQTL, expression QTL; sQTL, splicing QTL; mQTL, methylation QTL; pQTL, protein-expression QTL; haQTL, histone acetylation QTL; coloc, colocalization; eTWAS, expression transcriptome-wide association study; sTWAS, splicing transcriptome-wide association study; PWAS, proteome-wide association study; Mon. Mac., monocytes and macrophages; LCL, lymphoblastoid cell line; QTLCat, The eQTL Catalogue.

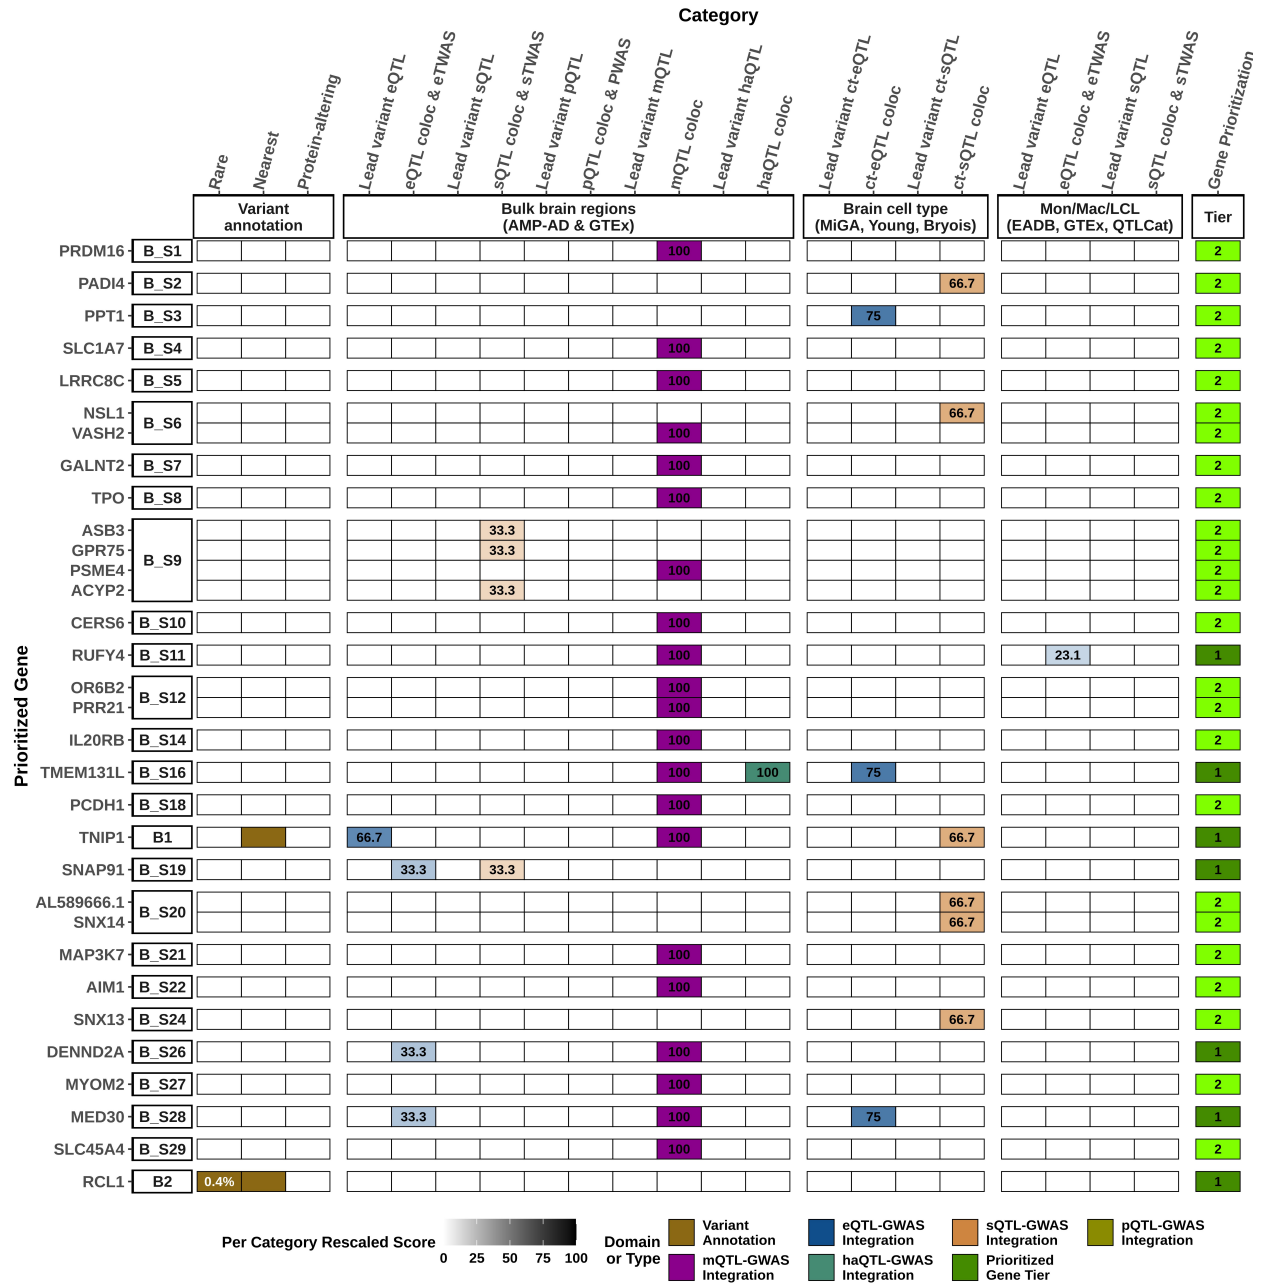

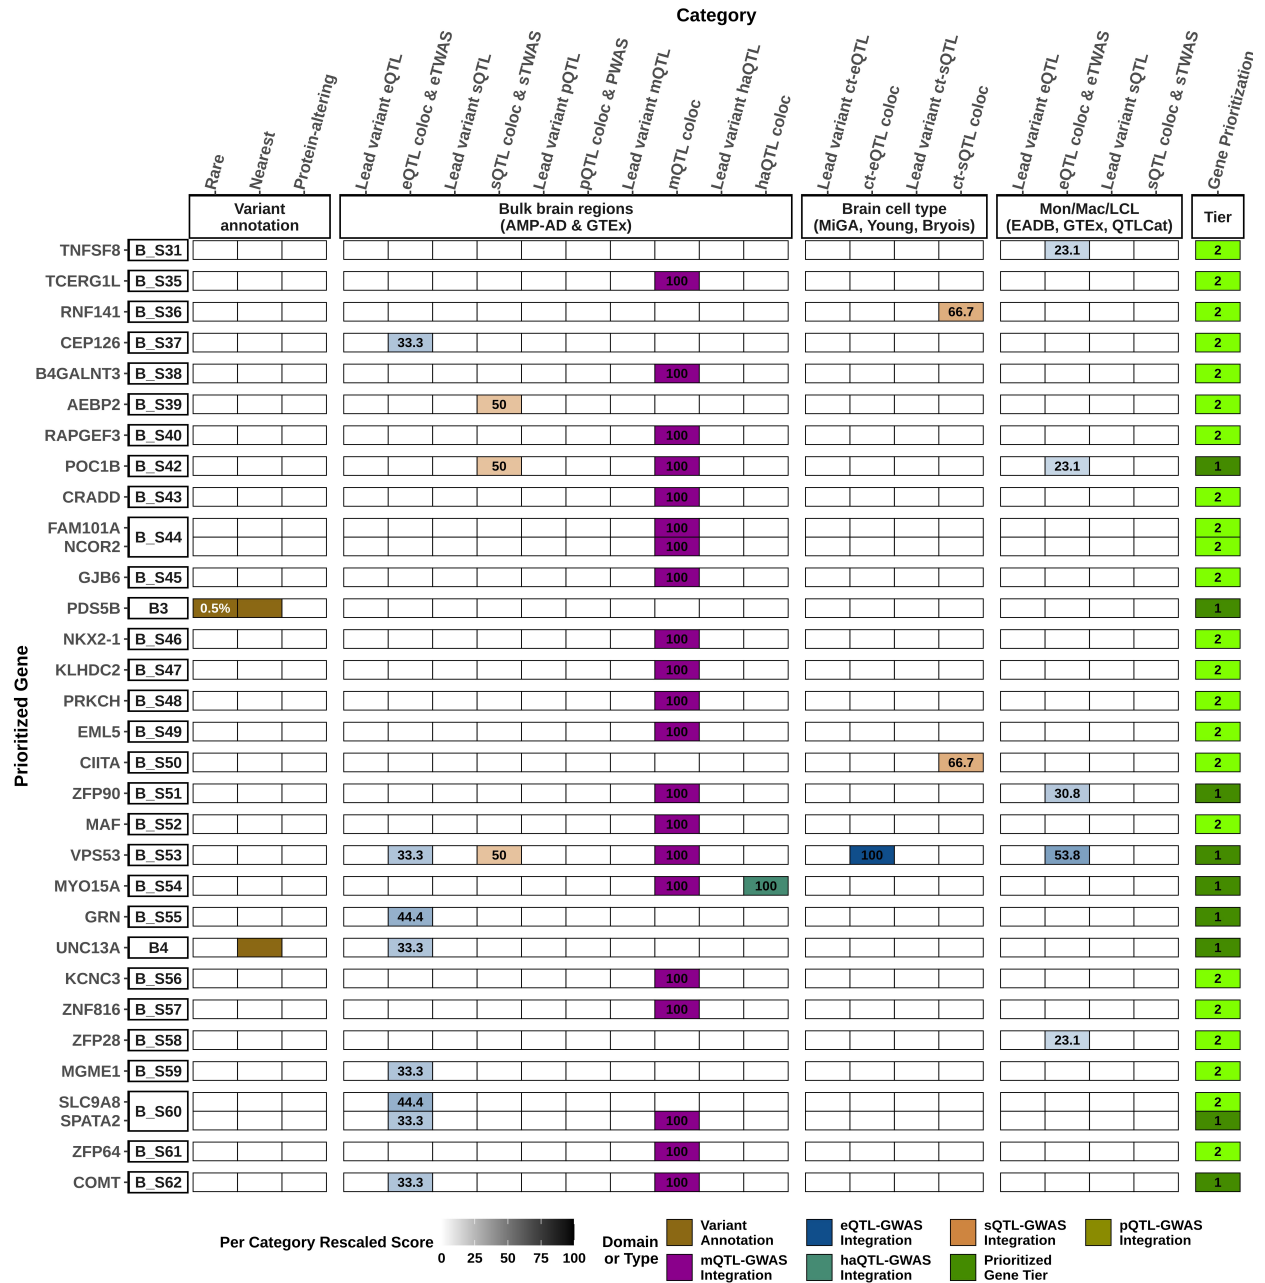

**Supplementary Figure 5. Gene prioritization results for FTL D-TDP C.** A visual summary of weighted evidence category scores for the prioritized genes within genome-wide significant and subthreshold loci for FTL D-TDP C GWAS. The leftmost squares indicate the locus index numbers which contain additional “\_S” patterns for the subthreshold loci, meanwhile others indicate the genome-wide significant loci. The types of evidence for each category are colored according to the six different domains to which they belonged. Weighted scores for each evidence category are rescaled to a 0–100 scale based on the maximum score a candidate gene can obtain from a category (see **Supplementary Table 2**). The darker colors represent higher scores in categories, while tier 1 prioritized genes are displayed in dark green and tier 2 prioritized genes are displayed in light green. Only tier 1 and tier 2 genes are shown for each locus, and all candidate genes considered and scored can be found in **Supplementary Table 3**. MAFs (based on gnomAD v4 non-Finnish European samples) and CADD (v1.7) PHRED scores for rare and/or protein-altering rare variants are labeled in white within the respective squares. eQTL, expression QTL; sQTL, splicing QTL; mQTL, methylation QTL; pQTL, protein-expression QTL; haQTL, histone acetylation QTL; coloc, colocalization; eTWAS, expression transcriptome-wide association study; sTWAS, splicing transcriptome-wide association study; PWAS, proteome-wide association study; Mon. Mac., monocytes and macrophages; LCL, lymphoblastoid cell line; QTLCat, The eQTL Catalogue.



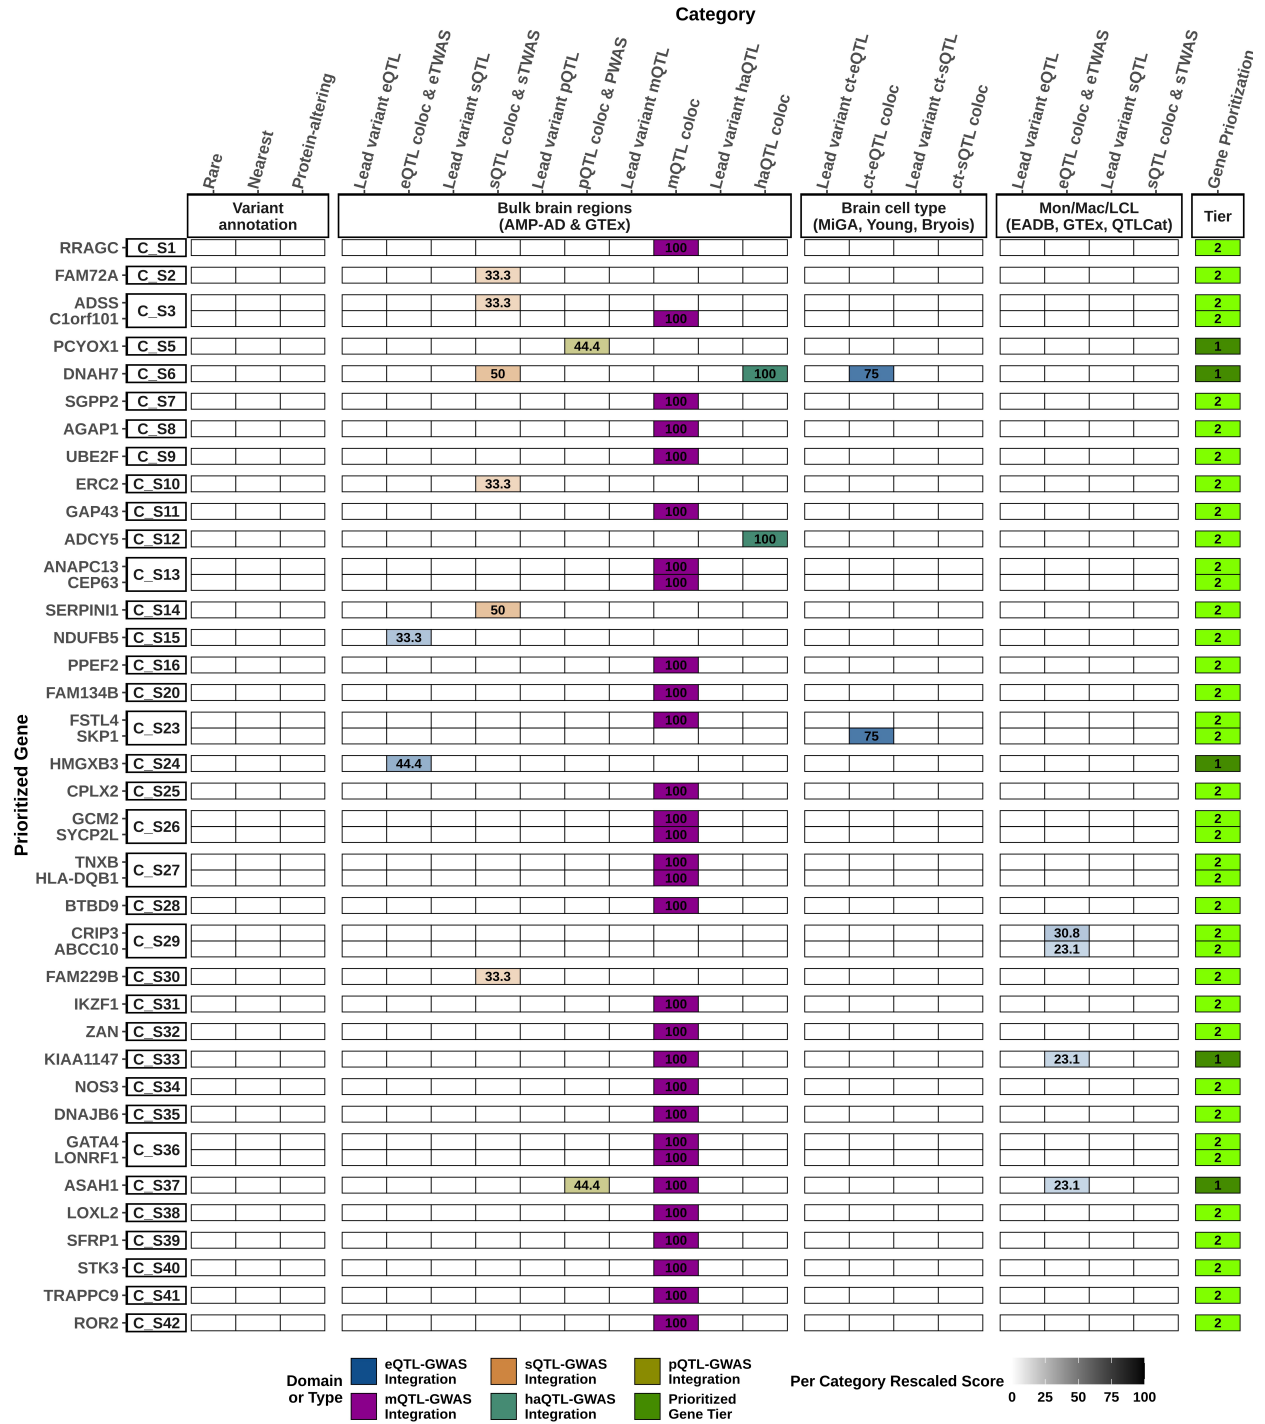

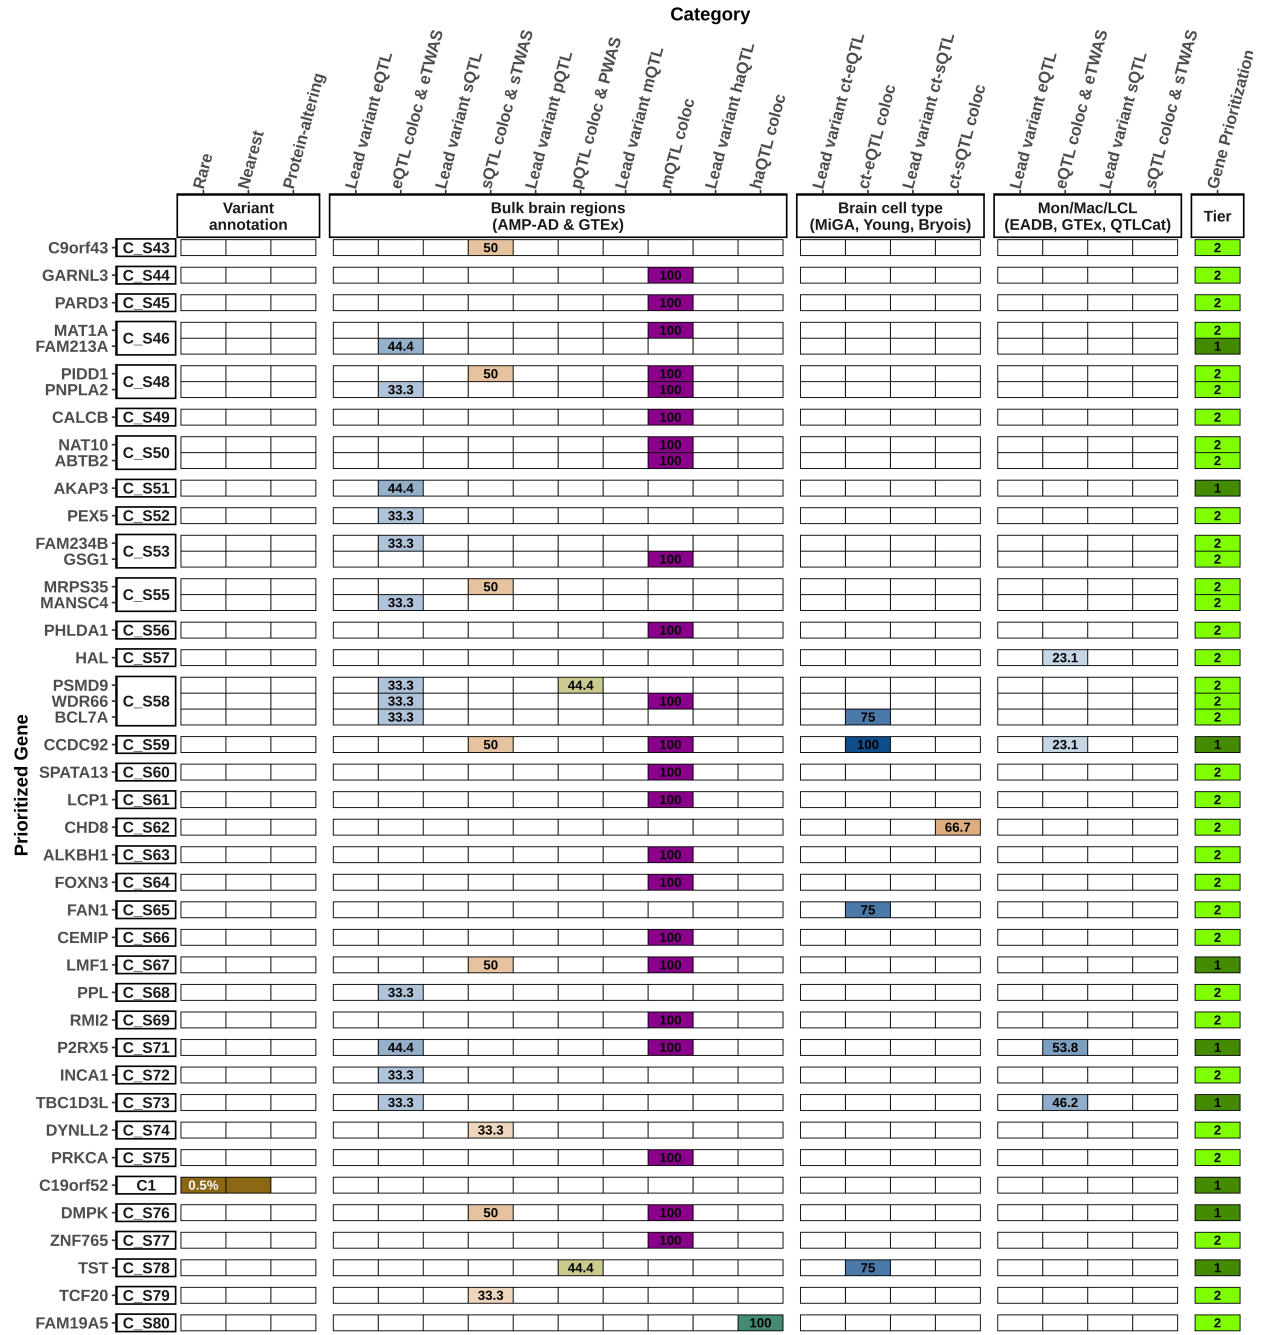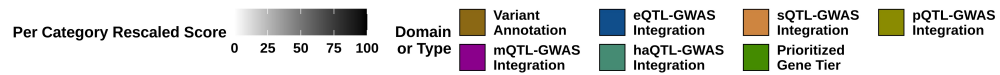

**Supplementary Figure 6. *RBPJL* and *L3MBTL1* RNA expression in brain tissue. A**

Weighted gene co-expression network from the ROSMAP dataset and the BrainExp database showing that both genes are part of the same module.

**B** Single nuclei RNA expression of *RBPJL* and *L3MBTL1* genes from the Seattle Alzheimer's Disease Brain cell Atlas from middle temporal gyrus of 84 aged donors. The darkness of the color of each nucleus increases as the expression level becomes higher.

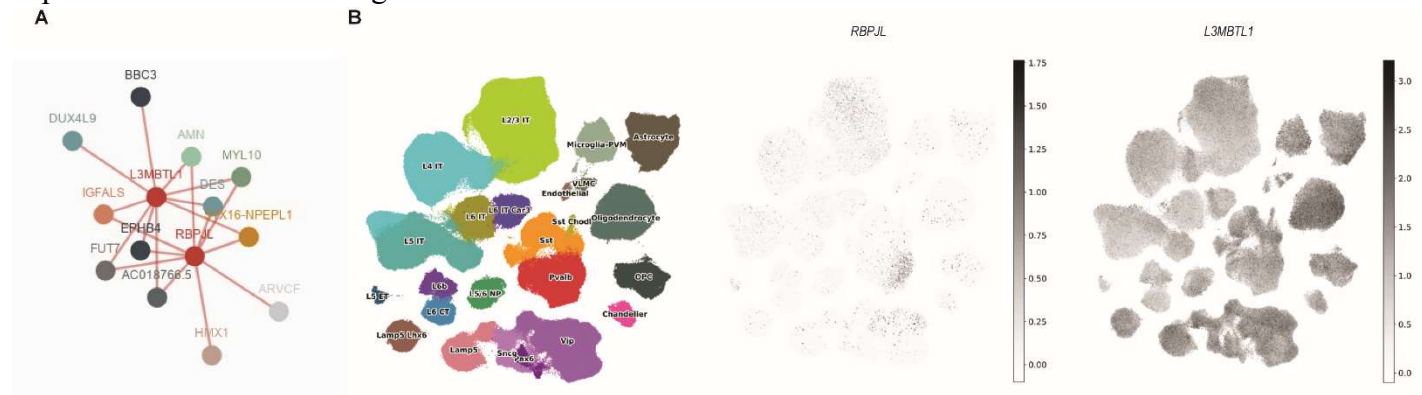

Supplement: Supplementary file [file media-1.pdf]
